# Supplementary material
Source: publisher site journal article supplement (https://www.spandidos-publications.com/2892/downloadSupplementary)

Figure S1. Inhibition of miR-128-3p lightened the si-CCNG1-induced decrease of CCNG1 protein level. Western blotting was used to examine the CCNG1 protein expression in (A) OVCAR-3 and (B) SKOV3 cells transfected with si-CCNG1, si-CCNG1 + anti-miR-128-3p or the relative controls. \* $P < 0.05$ . miR, microRNA; si-, small interfering; CCNG1, cyclin G1.

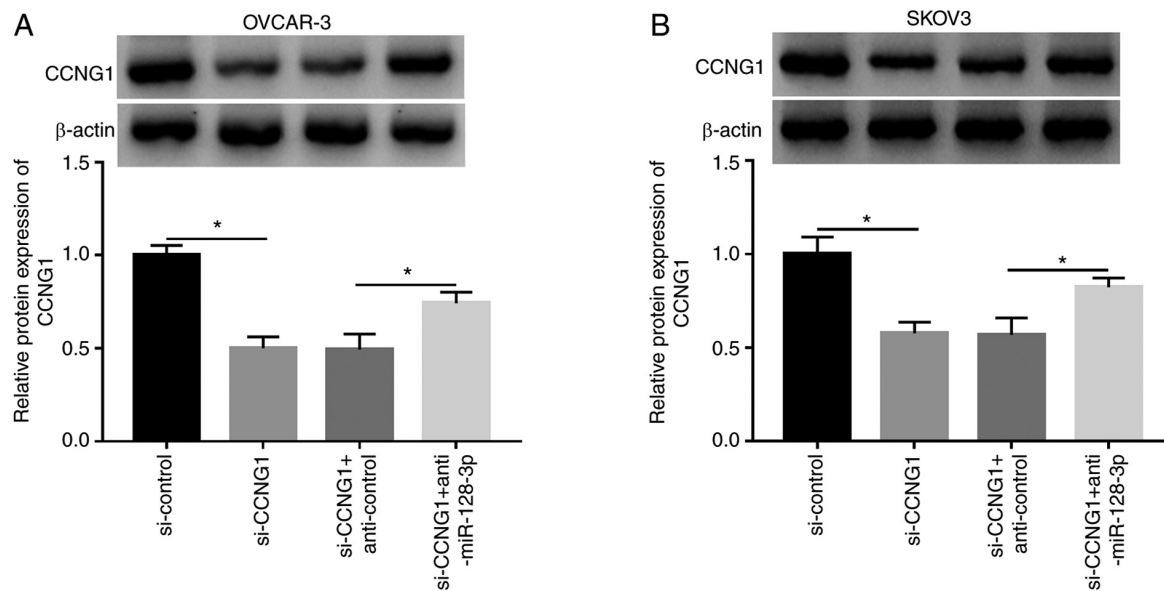

Supplement: Supplementary file 1 [file downloadSupplementary]
